# Supplementary material for: Electrochemical behavior of a pheochromocytoma cell suspension and the effect of acrylamide on the voltammetric response
Source: Royal Society of Chemistry journal article supplement (doi:10.1039/c4ay02552k), 2014-11-25

**Electrochemical behavior of the pheochromocytoma cell suspension and the effect of  
acrylamide on voltammetric response**

Jian Ji<sup>a,b</sup>, Donglei Jiang<sup>a,b</sup>, Jiadi Sun<sup>a,b</sup>, He Qian<sup>a</sup>, Yinzhi Zhang<sup>a</sup>, Xiulan Sun<sup>a,b\*</sup>

<sup>a</sup>State Key Laboratory of Food Science and Technology, School of Food Science of Jiangnan  
University, <sup>b</sup>School of Food Science Synergetic Innovation Center of Food Safety and Nutrition.  
Wuxi, Jiangsu 214122, China

First author: Jian Ji (E-mail: jijianjndx@126.com)

\*Corresponding author: Xiulan Sun (E-mail: sxlzzz@jiangnan.edu.cn)

**Scheme S1** Catabolism of intracellular hypoxanthine, adenine, guanine and xanthine.

**Scheme S1:**

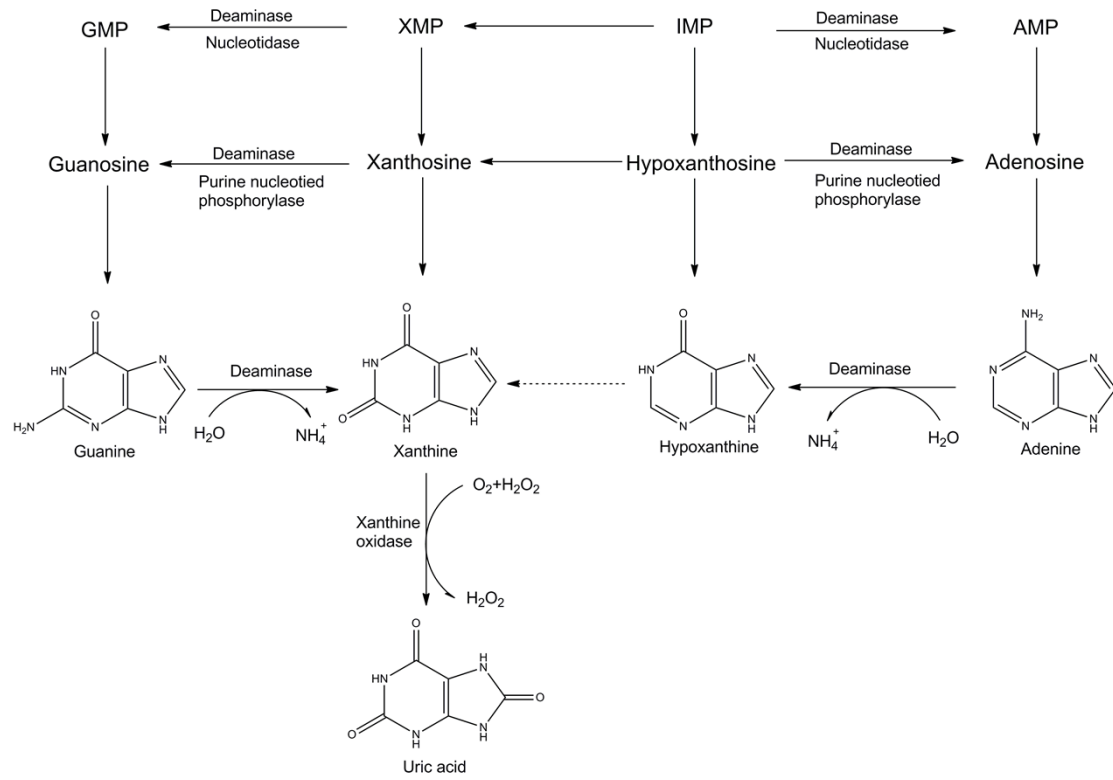

Supplement: c4ay02552k1.pdf [file c4ay02552k1.pdf]
